# Supplementary material for: Fisheries governance in the face of climate change: Assessment of policy reform implications for Mexican fisheries
Source: PLoS One. 2019 Oct 2;14(10):e0222317. doi: 10.1371/journal.pone.0222317 (PMC6774473; doi:10.1371/journal.pone.0222317)
Supplement: S2 Table — (XLSX) [file pone.0222317.s004.xlsx]

## Sheet: metadata
Climate change parameterization for factors that affect growth rate g
sci_name	Scientific name
param	Parameter name (growth rate, g)
temp_rise	Temperature increase
sea_level_rise	Sea level rise
acidification	Ocean acidification
disease_outb	Disease outbreak
fresh_water_inflow	Fresh water inflow
start_g	Starting value for g
end_g	Ending value for g
delta_g_perc	Percent change in g over time horizon

## Sheet: g_inputs
sci_name	param	temp_rise	sea_level_rise	acidification	disease_outb	fresh_water_inflow	start_g	end_g	delta_g_perc
Hexaplex nigritus	g	0	0.05	-0.05	0	0	0.0632997	0.0631414	-0.25
Callinectes bellicosus	g	0	0.05	-0.05	-0.05	0.05	0.174074	0.173205	-0.499375
Stomolophus meleagris	g	0.1	0.05	-0.05	0	0	0.235791	0.258722	9.725
Megapitaria squalida	g	0	0.05	-0.05	0	-0.05	0.0395623	0.0374902	-5.2375
Panopea globosa	g	0.05	0.05	-0.05	0	-0.025	0.0237374	0.0242404	2.11906
Cynoscion othonopterus	g	0	0.05	-0.05	0	-0.05	0.109192	0.103473	-5.2375
Nodipecten subnodosus	g	0	0.05	-0.1	0	0	0.0474747	0.0448636	-5.5
Haliotis sorenseni	g	-0.1	0	-0.1	-0.15	-0.05	0.0234873	0.0153625	-34.5925
Pinna rugosa	g	0	0.025	-0.05	0	0	0.0300673	0.0292781	-2.625
Strombus gigas	g	0	0.025	-0.05	0	0	0.0632997	0.061638	-2.625
Lutjanus peru	g	-0.05	0.025	-0.05	0	0	0.0300673	0.0278142	-7.49375
Isostichopus fuscus	g	0.05	0.025	-0.05	0	0	0.0158249	0.01618	2.24375
Centropomus robalito	g	0	0.05	-0.05	0	0.05	0.0791246	0.0828731	4.7375
Scomberomorus sierra	g	0	0	-0.05	0	0	0.237374	0.225505	-5
Panulirus interruptus	g	0	0.025	-0.05	0	0	0.0316498	0.030819	-2.625
Ballistes polylepis	g	0	0	-0.05	0	0	0.0395623	0.0375842	-5
Merluccius productus	g	0	0	-0.05	0	0	0.0553872	0.0526178	-5
Sardinops sagax	g	-0.1	0	-0.05	0	0	0.174074	0.148833	-14.5
Pleuroncodes planipes	g	-0.1	0	-0.1	0	0	0.237374	0.192273	-19
Thunnus albacares	g	0	0	-0.05	0	0	0.0316498	0.0300673	-5
Carcharhinus limbatus	g	0	0	0	0	0	0.0295926	0.0295926	0
Litopenaeus stylirostris	g	0	0	-0.05	-0.05	0.025	0.197811	0.182988	-7.49375
Dosidicus gigas	g	-0.05	0	-0.05	0	0	0.253199	0.228512	-9.75
Coryphaena hippurus	g	0	0	-0.05	0	0	0.109192	0.103732	-5
Epinephelus morio	g	-0.05	0	-0.05	0	0	0.0632997	0.0571279	-9.75
